# Supplementary material for: Erythroid-Specific Transcriptional Changes in PBMCs from Pulmonary Hypertension Patients
Source: PLoS One. 2012 Apr 24;7(4):e34951. doi: 10.1371/journal.pone.0034951 (PMC3335832; doi:10.1371/journal.pone.0034951)
Supplement: Table S3 — Demographic and clinical data for subjects. (XLSX) [file pone.0034951.s003.xlsx]

## Sheet: PAH_phenotype_file_6Oct2010_404
index	group_sample name	Age	Gender	Race	NYHA Functional Class (for PAH patients)	6MWD (blank or NA means not available-applies to all clinical variables)	yes, if the date of the 6MWD is within 4 months of the date of the blood draw for the microarray sample; otherwise is blank	RA mean	CI	PVRI	PA saturation	yes if the date of the RA mean, CI, PVRI and PA saturation measurement during RHC was within 4 months of the date of the blood draw for the microarray sample	ALAS2 (ILMN_2367126) expression (scaled, log2 transformed)	ERAF (ILMN_1696512) expression (scaled, log2 transformed)	end
1	SSc-PH-ILD_PAH-80	55	Male	Caucasian	III	1258	yes	8	1.64	2340	56		10.799	10.034	end
2	SSc-PH-ILD_PAH-62	51	Female	Caucasian	III	1044	yes	4	2.53	980	72.9	yes	8.495	8.129	end
3	SSc-PH-ILD_PAH-54	71	Female	Caucasian	III	683	yes	14	3.8	905	NA		12.189	10.988	end
4	SSc-PH-ILD_PAH-52	65	Female	Caucasian	III	580	yes	5	2.84	1239	62.1		16.965	15.226	end
5	SSc-PH-ILD_PAH-49	55	Female	Asian	III	1102		5	3.72	580	74.2		16.561	14.138	end
6	SSc-PH-ILD_PAH-36	45	Male	Caucasian	III	1112	yes	12	2.3	487	66.1		16.397	14.454	end
7	SSc-PH-ILD_PAH-19	71	Female	Caucasian	III	1183	yes	8	2.48	1290	64.5		13.799	12.032	end
8	SSc-PH-ILD_PAH-132	74	Female	Caucasian	II	169	yes	4	3.73	514	72.4	yes	12.712	11.034	end
9	SSc-PAH_PH9	69	Female	Caucasian	III	928	yes	6	2.88	611	73.9	yes	15.011	14.312	end
10	SSc-PAH_PH8	69	Female	Caucasian	II	978	yes	4	1.85	1297	61.3	yes	9.784	9.034	end
11	SSc-PAH_PH7	70	Female	Caucasian	III	1072		8	2.13	638	68.5	yes	8.967	8.5	end
12	SSc-PAH_PH5	71	Female	African American	II	730	yes	4	2.38	974	61.9	yes	13.815	12.164	end
13	SSc-PAH_PH10	57	Female	Caucasian	II	855		6	3.3	848	73.3	yes	17.411	16.339	end
14	SSc-PAH_PAH-96	53	Female	Caucasian	II	1500		8	2.09	956	65		12.466	11.648	end
15	SSc-PAH_PAH-94	68	Male	Caucasian	III	1057	yes	10	3.82	377	73.1	yes	9.25	8.999	end
16	SSc-PAH_PAH-86	56	Female	Caucasian	III	1727		3	3.56	831	77.4		13.458	12.449	end
17	SSc-PAH_PAH-85	58	Female	Caucasian	II	1258		10	3.3	993	70.6		14.025	12.57	end
18	SSc-PAH_PAH-82	45	Female	Caucasian	III	981	yes	13	2.77	981	69.9		12.649	11.197	end
19	SSc-PAH_PAH-79	59	Male	Caucasian	III	941	yes	4	2.53	411	66.1		12.012	10.08	end
20	SSc-PAH_PAH-78	42	Female	African American	II	1359	yes	8	1.68	476	51.4		10.758	9.766	end
21	SSc-PAH_PAH-77	61	Female	Caucasian	I	1420	yes	7	2.46	553	68.7	yes	8.647	8.899	end
22	SSc-PAH_PAH-74	55	Male	Caucasian	I	1681	yes	12	2.62	793	72	yes	9.479	9.079	end
23	SSc-PAH_PAH-73	75	Male	African American	III	381	yes	10	1.2	2465	49.5	yes	11.952	10.787	end
24	SSc-PAH_PAH-72	64	Female	African American	IV	817	yes	18	1.35	2014	57.4	yes	11.45	10.604	end
25	SSc-PAH_PAH-70b	34	Female	Asian	II	1408		3	2.5	960	NA		10.073	9.278	end
26	SSc-PAH_PAH-65b	51	Female	Caucasian	III	810	yes	NA	NA	NA	NA		11.946	10.407	end
27	SSc-PAH_PAH-64b	51	Male	Caucasian	II	1036	yes	4	3.24	444	72.8		10.149	8.551	end
28	SSc-PAH_PAH-61	60	Female	Caucasian	II	1516	yes	3	3.05	603	71.9		12.069	11.374	end
29	SSc-PAH_PAH-55	47	Male	African American	III	1213	yes	9	1.67	1484	61.5	yes	14.362	12.629	end
30	SSc-PAH_PAH-44	49	Female	Caucasian	II	1623	yes	8	3.59	535	74.7		10.802	9.7	end
31	SSc-PAH_PAH-43	51	Male	Caucasian	III	1389		10	3.64	791	70.3	yes	13.163	12.128	end
32	SSc-PAH_PAH-42	67	Female	Caucasian	II	522	yes	6	2.86	391	74.7		13.999	11.782	end
33	SSc-PAH_PAH-41	59	Male	Caucasian	II	1203		20	3.85	727	58.1		13.863	12.488	end
34	SSc-PAH_PAH-38	80	Male	African American	III	396	yes	10	1.51	1800	41.2		14.016	12.634	end
35	SSc-PAH_PAH-35	58	Female	Caucasian	II	1233	yes	10	3.16	709	77.7		11.181	9.801	end
36	SSc-PAH_PAH-34	66	Female	Caucasian	III	830	yes	7	2.25	1422	63.7		14.681	12.735	end
37	SSc-PAH_PAH-30	18	Female	Caucasian	II	1450	yes	7	3.56	1123	68	yes	13.201	11.612	end
38	SSc-PAH_PAH-26	81	Female	African American	III	1130	yes	4	2.63	1099	72.2		17.004	14.987	end
39	SSc-PAH_PAH-24	44	Female	Caucasian	II	1149		8	3.53	317	73.5	yes	13.342	11.147	end
40	SSc-PAH_PAH-21	74	Female	Caucasian	III	900	yes	2	1.8	1333	68.1		9.937	9.547	end
41	SSc-PAH_PAH-17	49	Female	Caucasian	II	1276	yes	16	1.51	2277	57.4		11.032	9.493	end
42	SSc-PAH_PAH-145	53	Female	Caucasian	II	1324	yes	7	2.31	1004	72.5	yes	8.848	8.945	end
43	SSc-PAH_PAH-144	77	Female	Caucasian	II	1016		2	3.24	444	71	yes	8.608	8.309	end
44	SSc-PAH_PAH-139	68	Female	Caucasian	II	641	yes	8	2.57	1213	70.9	yes	10.266	9.617	end
45	SSc-PAH_PAH-138	60	Female	African American	II	400	yes	18	1.77	2304	55.9	yes	12.169	10.011	end
46	SSc-PAH_PAH-137	65	Female	Caucasian	III	1233	yes	8	3.36	619	69.7	yes	10.091	9.122	end
47	SSc-PAH_PAH-135	67	Female	Caucasian	III	1238	yes	2	2.32	620	69.9	yes	9.715	8.838	end
48	SSc-PAH_PAH-134	71	Female	Caucasian	III	1031	yes	6	3.05	839	65.3	yes	14.959	11.267	end
49	SSc-PAH_PAH-09	65	Female	Caucasian	II	NA		10	3.42	304	71.5	yes	16.28	13.85	end
50	SSc-PAH_PAH-08	71	Female	Caucasian	II	1090	yes	3	2.66	571	70.8	yes	11.072	9.857	end
51	SSc_PH5-30	46	Female	Caucasian									14.452	13.313	end
52	SSc_PH5-29	47	Female	Caucasian									12.17	11.023	end
53	SSc_PH5-28	69	Female	Caucasian									11.471	9.946	end
54	SSc_PH5-27	38	Female	Caucasian									9.092	8.725	end
55	SSc_PH5-26	51	Female	Caucasian									8.34	8.271	end
56	SSc_PH5-25	47	Female	Caucasian									14.849	12.661	end
57	SSc_PH5-24	71	Female	Caucasian									11.855	10.317	end
58	SSc_PH5-23	55	Female	Caucasian									8.531	7.958	end
59	SSc_PH5-22	55	Female	Caucasian									9.475	9.242	end
60	SSc_PH5-20	69	Female	Caucasian									9.607	9.347	end
61	SSc_PH5-19	52	Female	Caucasian									8.132	8.073	end
62	SSc_PH5-18	50	Female	Caucasian									8.333	8.107	end
63	SSc_PH5-17	47	Female	Caucasian									9.062	8.534	end
64	SSc_PH5-16	47	Female	Caucasian									9.786	8.654	end
65	SSc_PH5-15	52	Female	Caucasian									10.018	9.266	end
66	SSc_PH5-14	57	Female	Caucasian									11.677	11.015	end
67	SSc_PH5-13	68	Female	Caucasian									9.564	8.68	end
68	SSc_PH5-12	67	Female	Caucasian									8.917	8.655	end
69	SSc_PH5-11	48	Female	Caucasian									8.185	8.082	end
70	IPAH_PAH-93	52	Female	Caucasian	II	928	yes	12	2.41	1360	62.5	yes	13.974	13.097	end
71	IPAH_PAH-84	43	Female	African American	II	NA		9	2.27	2431	37	yes	15.838	15.186	end
72	IPAH_PAH-83	38	Female	Hispanic	I	1798	yes	9	1.85	519	61.5		14.358	13.321	end
73	IPAH_PAH-76	32	Female	Caucasian	II	1344		10	3.57	874	76.6	yes	10.959	10.149	end
74	IPAH_PAH-75	38	Female	Caucasian	II	1915		4	2.8	1142	NA	yes	8.673	8.46	end
75	IPAH_PAH-69	64	Female	Caucasian	III	920		13	2.06	1087	62.9		13.26	12.008	end
76	IPAH_PAH-68b	25	Female	Caucasian	II	1783	yes	15	2.2	2253	61.1	yes	15.6	14.763	end
77	IPAH_PAH-67	69	Female	Caucasian	III	905		3	2.18	1430	69.7		10.29	9.397	end
78	IPAH_PAH-60	51	Female	Caucasian	II	1145		6	1.88	2127	61.6		8.925	8.507	end
79	IPAH_PAH-59	42	Female	Asian	II	NA		3	2.18	1320	71.5	yes	10.576	9.767	end
80	IPAH_PAH-53	51	Female	Caucasian	I	1184	yes	8	2.56	656	76.3		9.769	9.007	end
81	IPAH_PAH-51	61	Female	Caucasian	III	1238		8	3.41	961	72.6	yes	11.211	10.206	end
82	IPAH_PAH-48	48	Female	Caucasian	I	1450	yes	4	2.78	575	62.8		16.345	14.295	end
83	IPAH_PAH-47	49	Female	African American	II	1719		5	3.31	290	78.5		12.138	10.884	end
84	IPAH_PAH-46	38	Female	Caucasian	II	1470		9	4.37	732	70.1		17.249	15.148	end
85	IPAH_PAH-40	54	Female	African American	IV	421		18	2.08	1730	57.7		15.696	14.736	end
86	IPAH_PAH-39	42	Female	African American	I	1410		2	2.66	992	67.7		11.492	10.431	end
87	IPAH_PAH-33	64	Female	Caucasian	II	NA		12	2.25	1457	64.7		15.102	14.321	end
88	IPAH_PAH-32	66	Female	Caucasian	II	1263	yes	15	1.87	1582	45.9		8.948	8.492	end
89	IPAH_PAH-31	65	Female	Caucasian	II	1324	yes	9	1.74	1838	62.2		9.172	8.47	end
90	IPAH_PAH-27	66	Female	Caucasian	II	1193		4	2.88	1610	72.8		15.788	13.654	end
91	IPAH_PAH-25	59	Female	Caucasian	III	1203	yes	6	3.32	939	65.2	yes	11.271	10.804	end
92	IPAH_PAH-23	73	Male	Caucasian	III	1132	yes	11	1.85	2118	65.5		11.225	10.707	end
93	IPAH_PAH-22	42	Female	Caucasian	III	1392		4	2.79	774	74.9	yes	8.332	8.197	end
94	IPAH_PAH-20	44	Male	Caucasian	I	2070	yes	7	3.03	449	79	yes	12.39	11.22	end
95	IPAH_PAH-18	48	Female	Caucasian	I	1422	yes	5	2.55	1066	68.7		12.283	10.522	end
96	IPAH_PAH-16-2	68	Male	Caucasian	II	1808	yes	6	4.11	681	66.9		15.921	13.879	end
97	IPAH_PAH-14	56	Male	Caucasian	I	2222	yes	7	3.27	611	69.1	yes	9.577	8.714	end
98	IPAH_PAH-136	67	Female	African American	II	1188		2	1.73	1618	NA		12.045	10.224	end
99	IPAH_PAH-133	50	Male	Caucasian	II	1495	yes	4	2.38	1209	66.6	yes	10.651	10.878	end
100	Control_PAH-99	49	Female	Caucasian									8.434	8.292	end
101	Control_PAH-98	63	Female	Caucasian									11.706	10.182	end
102	Control_PAH-95	43	Female	Caucasian									10.819	9.334	end
103	Control_PAH-92	45	Male	Caucasian									9.139	8.917	end
104	Control_PAH-91	53	Male	Caucasian									8.059	8.573	end
105	Control_PAH-90	58	Male	Caucasian									11.301	10.146	end
106	Control_PAH-89	53	Male	Asian									10.155	9.151	end
107	Control_PAH-88	48	Male	Caucasian									8.354	8.113	end
108	Control_PAH-87	40	Male	Caucasian									8.86	8.601	end
109	Control_PAH-142	60	Female	African American									9.738	9.078	end
110	Control_PAH-130	43	Female	Caucasian									9.263	8.363	end
111	Control_PAH-129	68	Female	Caucasian									10.628	9.677	end
112	Control_PAH-128	62	Female	Caucasian									10.078	8.804	end
113	Control_PAH-127	28	Female	African American									10.469	9.566	end
114	Control_PAH-126	37	Female	Caucasian									11.694	10.041	end
115	Control_PAH-125	24	Female	Caucasian									12.382	11.262	end
116	Control_PAH-124	55	Female	Caucasian									10.453	9.285	end
117	Control_PAH-123	37	Female	Caucasian									8.095	8.021	end
118	Control_PAH-122	33	Female	African American									9.236	8.907	end
119	Control_PAH-121	40	Female	African American									8.473	8.646	end
120	Control_PAH-120	22	Female	Caucasian									8.178	8.352	end
121	Control_PAH-119	45	Female	Caucasian									9.253	8.77	end
122	Control_PAH-118	50	Female	Caucasian									8.623	8.395	end
123	Control_PAH-117	39	Female	African American									12.223	11.85	end
124	Control_PAH-116	57	Female	Caucasian									10.152	8.821	end
125	Control_PAH-115	66	Female	African American									12.215	12.149	end
126	Control_PAH-114	35	Female	Caucasian									8.839	8.8	end
127	Control_PAH-113	56	Female	Caucasian									9.922	8.661	end
128	Control_PAH-112	38	Female	Caucasian									9.444	8.746	end
129	Control_PAH-111	32	Female	Caucasian									8.73	8.287	end
130	Control_PAH-110	40	Female	African American									11.934	10.552	end
131	Control_PAH-109	28	Female	Caucasian									8.886	8.352	end
132	Control_PAH-108	30	Female	Caucasian									10.302	8.758	end
133	Control_PAH-107	56	Female	Caucasian									8.964	8.676	end
134	Control_PAH-106	45	Female	Caucasian									11.032	9.557	end
135	Control_PAH-105	54	Female	Caucasian									10.365	9.549	end
136	Control_PAH-104	32	Female	Caucasian									8.225	8.267	end
137	Control_PAH-103	56	Female	Caucasian									8.357	8.192	end
138	Control_PAH-102	36	Female	Caucasian									8.658	8.112	end
139	Control_PAH-101	33	Male	Caucasian									9.902	9.241	end
140	Control_PAH-100	39	Female	Caucasian									9.101	8.774	end
